# Supplementary material
Source: MDPI journal article supplement (https://www.mdpi.com/2673-3501/2/4/25)
Supplement: s1 [file s1]

Supplementary Material

# Synthesis, Characterization and Catalytic Activity of UiO-66-NH<sub>2</sub> in the Levulinic Acid Esterification

Daiana A. Bravo Fuchineco <sup>1</sup>, Angélica C. Heredia <sup>1</sup>, Sandra M. Mendoza <sup>2</sup>, Enrique Rodríguez-Castellón <sup>3,\*</sup> and Mónica E. Crivello <sup>1</sup>

<sup>1</sup> Centro de Investigación y Tecnología Química (CITEQ)/Consejo Nacional de Investigaciones Científicas y Técnicas (CONICET)/Universidad Tecnológica Nacional - Facultad Regional Córdoba (UTN-FRC), X5016ZAA Córdoba, Argentina.

<sup>2</sup> CONICET, Facultad Regional Reconquista, Universidad Tecnológica Nacional, Reconquista, Argentina.

<sup>3</sup> Departamento de Química Inorgánica, Cristalografía y Mineralogía / Universidad de Málaga (UMA), Málaga, España.

\* Correspondence: castellon@uma.es

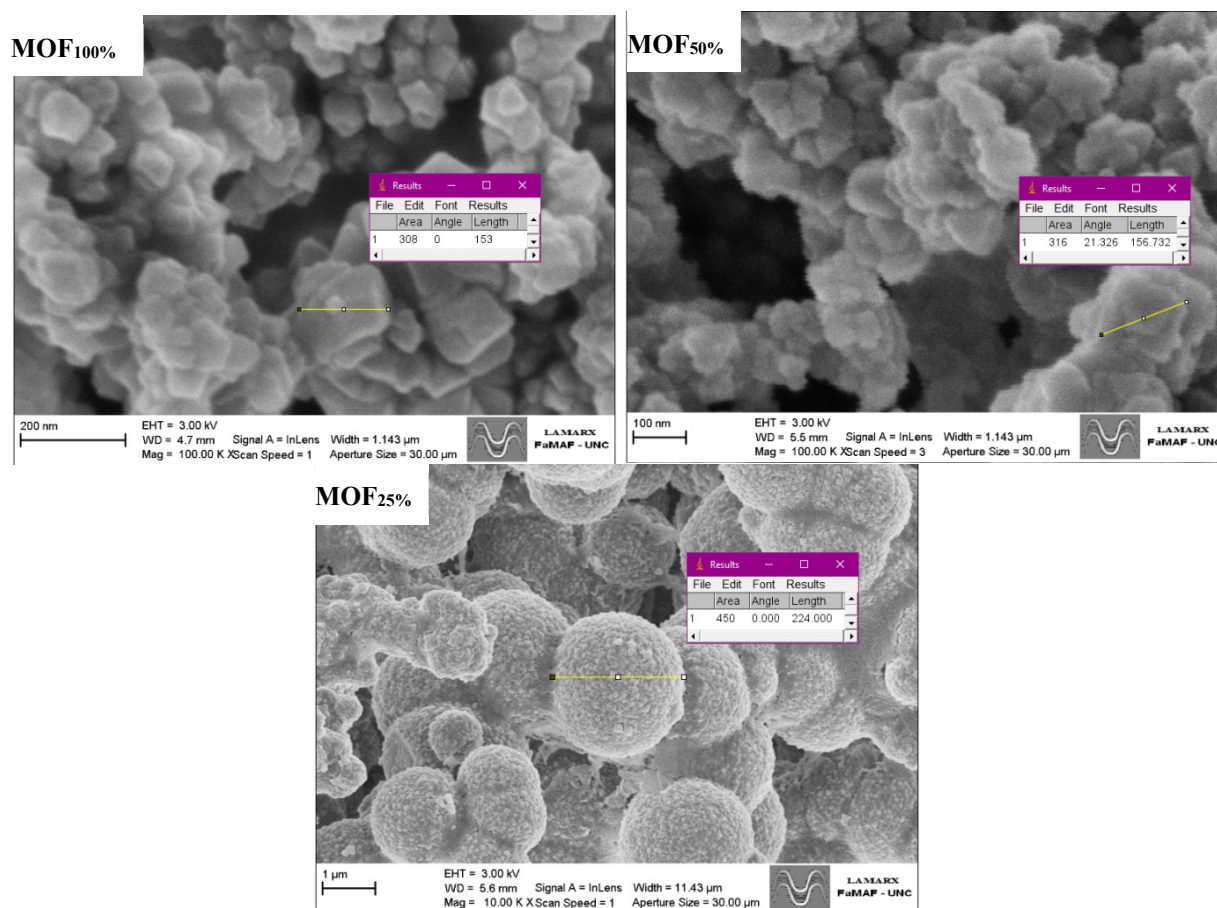

**Figure S1.** SEM image with average particle size included. MOF<sub>100%</sub> (A), MOF<sub>50%</sub> (B) and MOF<sub>25%</sub> (C).

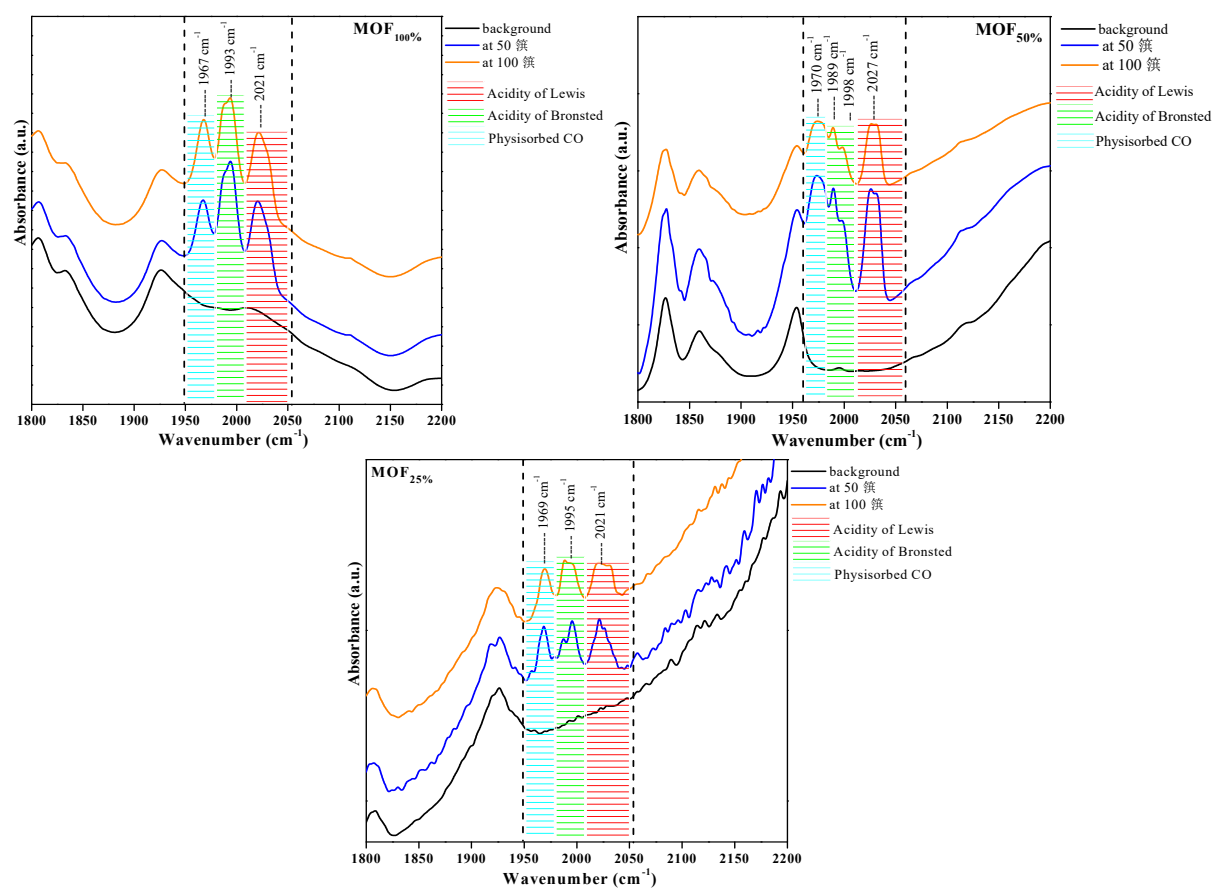

Figure S2. CO-FTIR absorption spectra of synthesized solids.

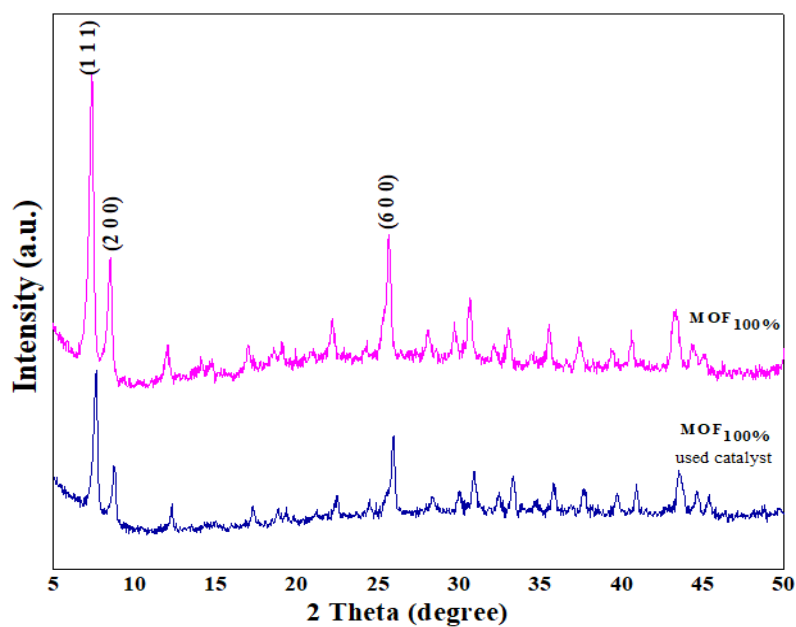

Figure S3. XRD pattern for the used catalyst—batch system.

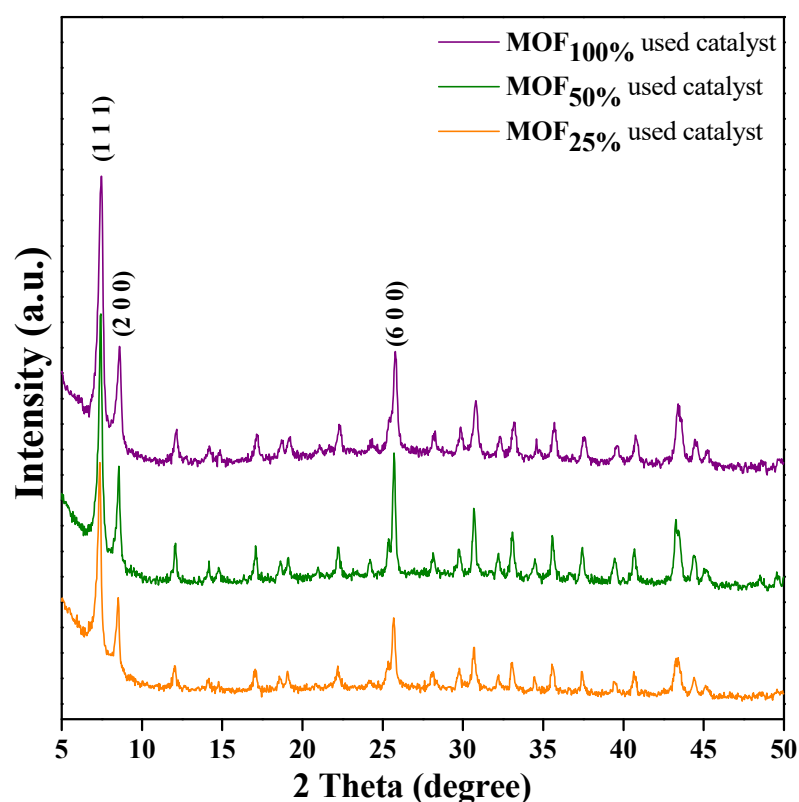

Figure S4. XRD pattern for the used catalyst - pressurized system.

The experimental data were fitted in a pseudo-first order kinetic equation to find the constant of reaction  $k$  (Equation (1)).

$$\ln[LA_t] = -k t + \ln[LA_0] \quad (1)$$

where  $[LA_0]$  is the initial concentration of LA ( $\text{mol.L}^{-1}$ ) and  $[LA_t]$  is the concentration at any time  $t$ . On the other hand,  $k$  is the slope and  $\ln[LA_0]$  is the intercept in a plot of  $\ln[LA_t]$  versus  $t$  (Figure S2).

Therefore, the reaction rate can be expressed as:

$$r_A = - \frac{dC_{LA}}{dt} = k C_{LA} \quad (2)$$

Table S1 shows experimental data used in the kinetic model.

Table S1. Estimation of kinetic parameters.

| Time (min) | Conversion (%) | [LA]  | Ln [LA] | $r_{LA}$ |
|------------|----------------|-------|---------|----------|
| 0          | 0              | 95.96 | 4.56    | 0.070    |
| 60         | 9.84           | 90.16 | 4.50    | 0.062    |
| 120        | 13.23          | 86.77 | 4.46    | 0.061    |
| 180        | 15.58          | 84.42 | 4.44    | 0.059    |
| 240        | 19.74          | 80.26 | 4.39    | 0.056    |
| 300        | 24.89          | 75.11 | 4.32    | 0.055    |

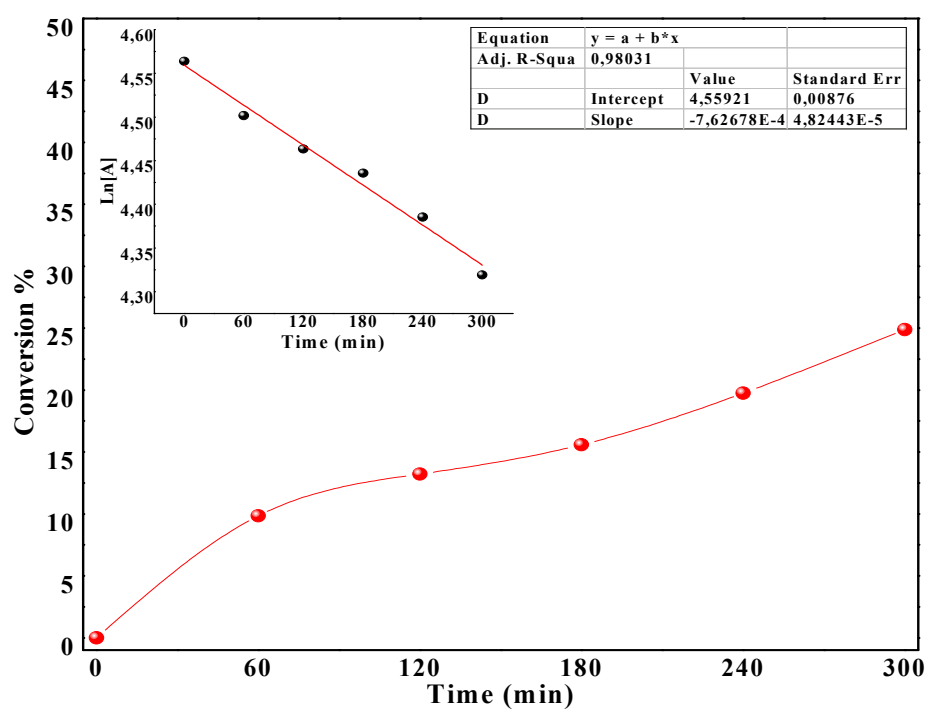

**Figure S5.** Kinetic constant adjustment (k). Conversion (%) and  $\ln [LA]$  vs. Time (min).
